# Supplementary material
Source: MDPI journal article supplement (https://www.mdpi.com/2073-445X/13/1/114)

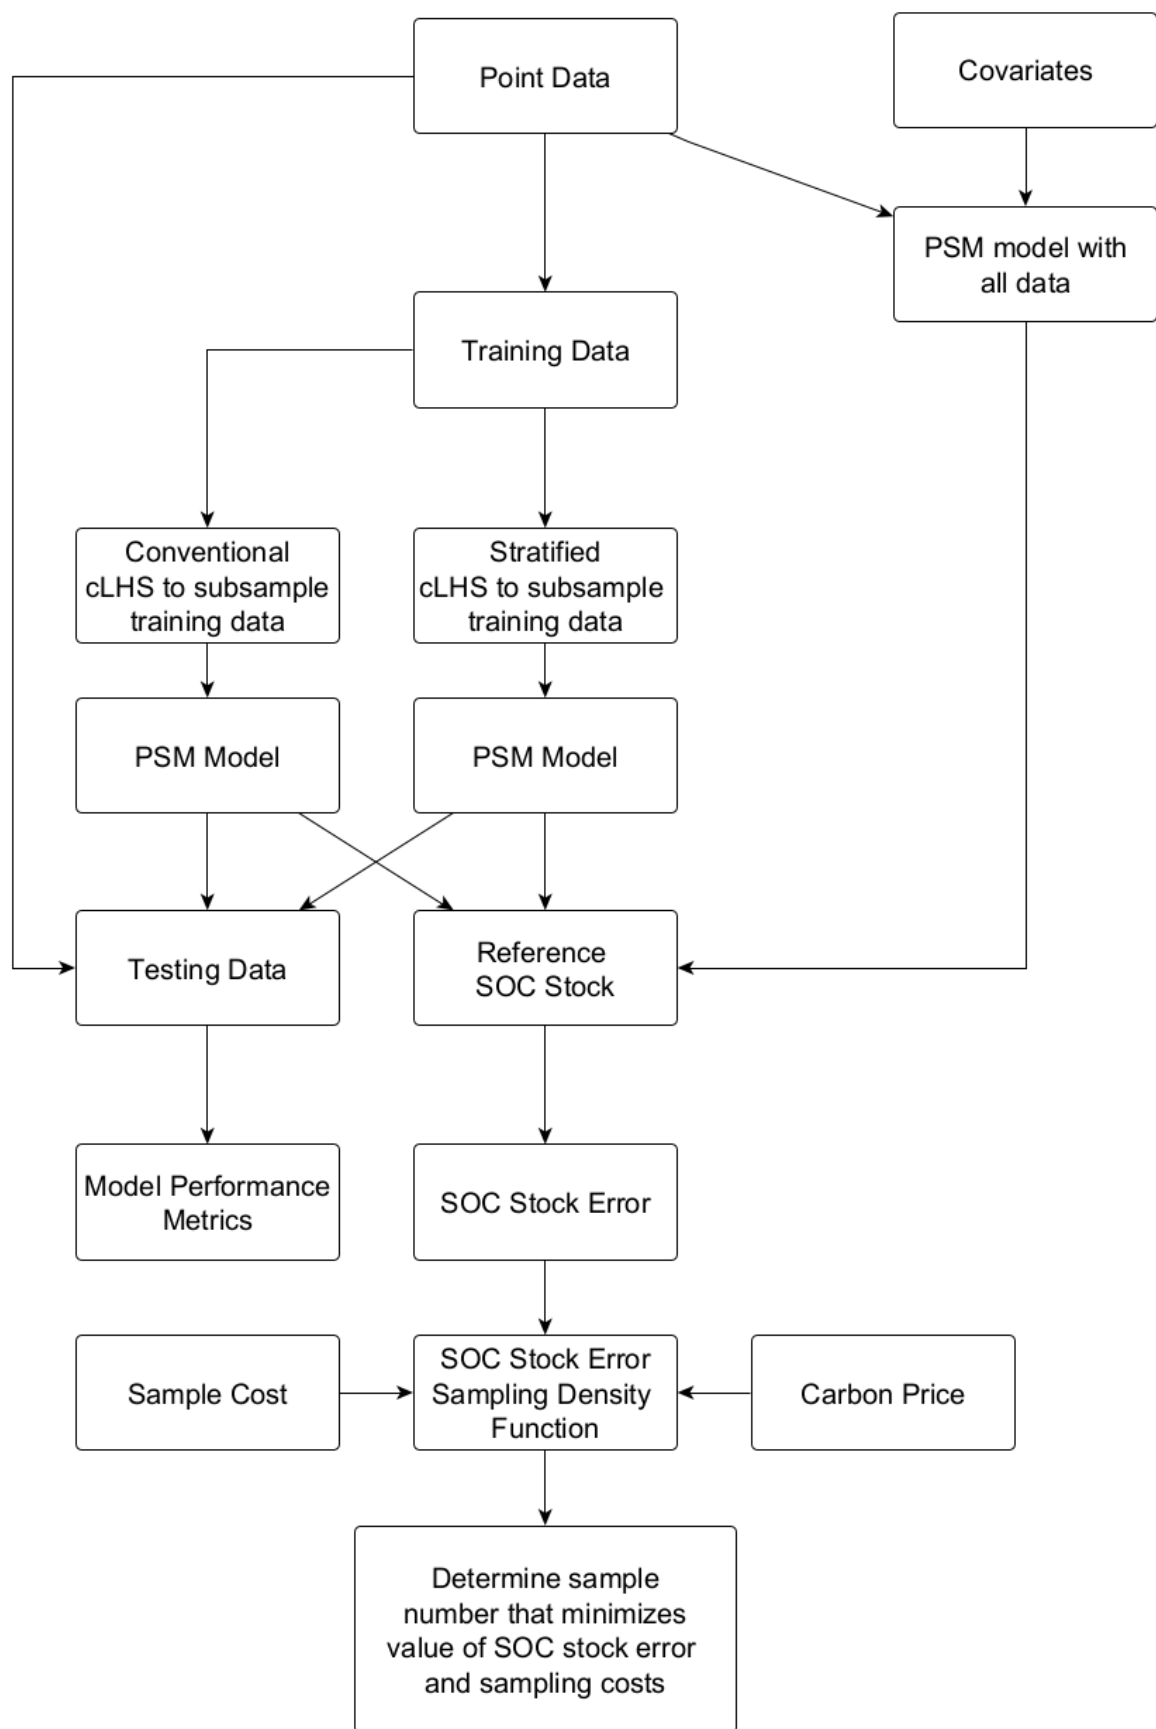

**Figure S1.** Data processing flow diagram.

Supplement: s1 [file s1]
